# Supplementary figures and images for: Effect of FM0807 Inhibits the Proliferation and Migration of RA-FLS through the JAK 2 / STAT3 Signaling Pathway
Source: Research Square preprint supplement (doi:10.21203/rs.3.rs-386711/v1), 2021-04-06

1. JAK2
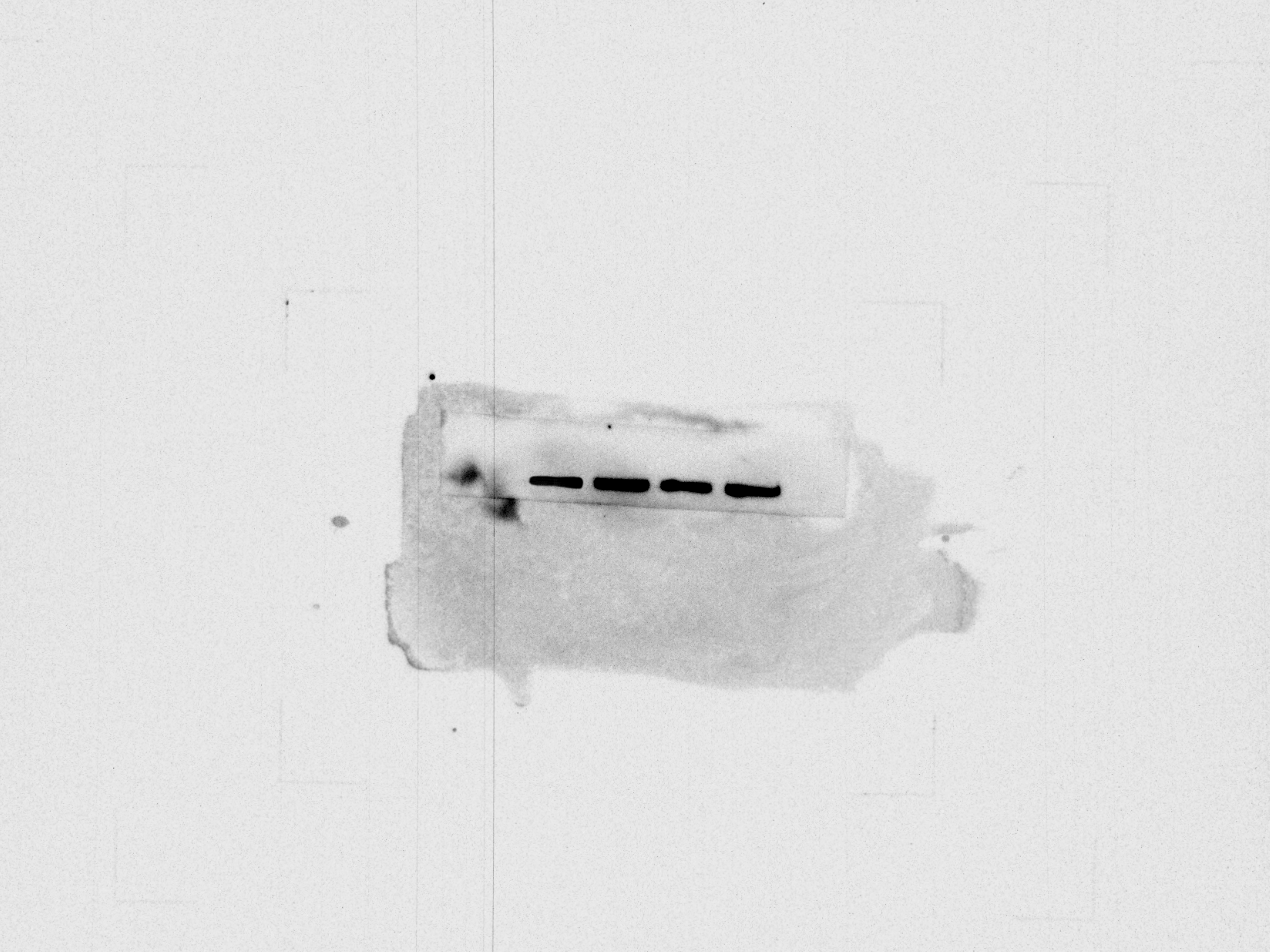

2. p-JAK2


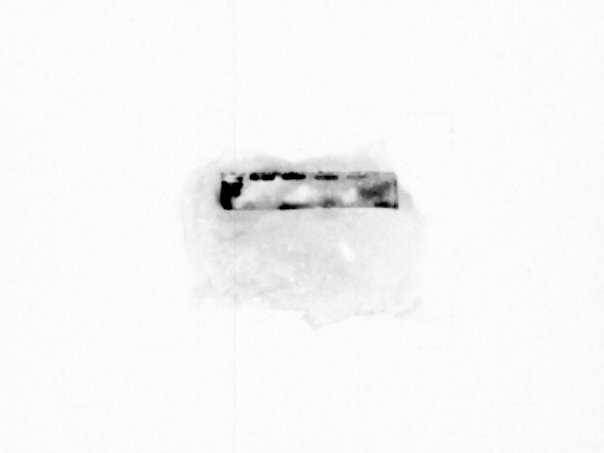


1. STAT3


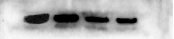


1. p-STAT3


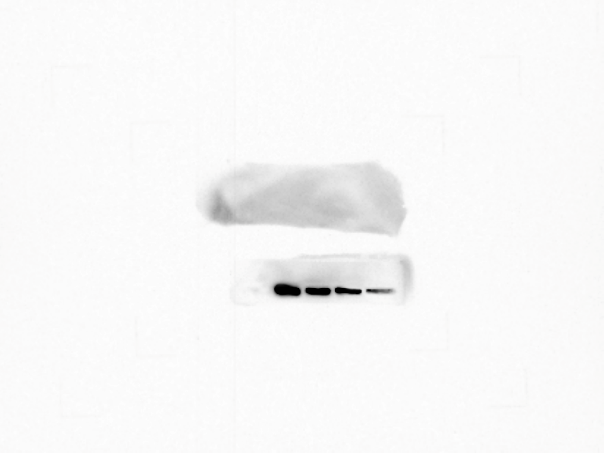


1. AKT


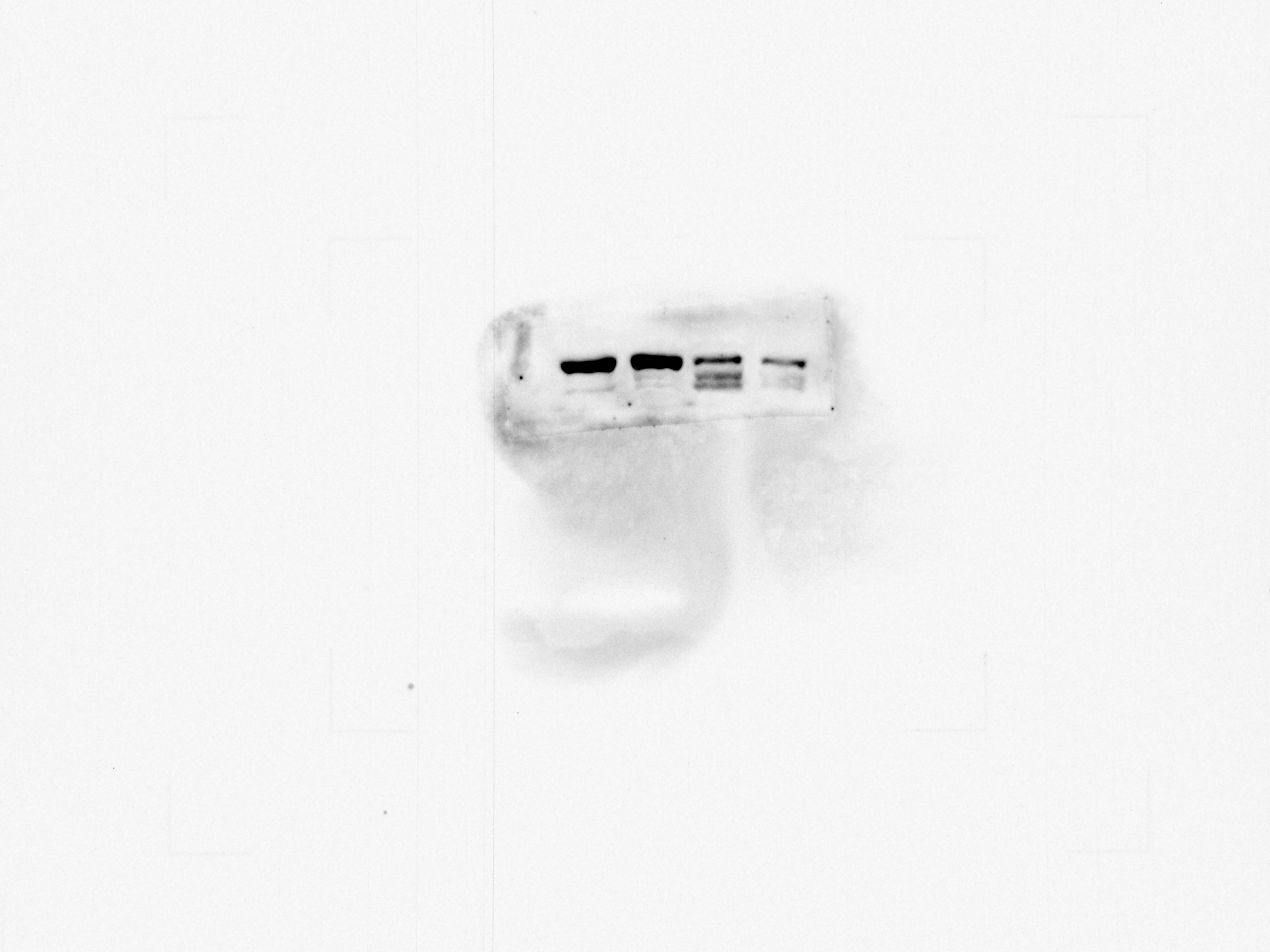


1. p-mTOR


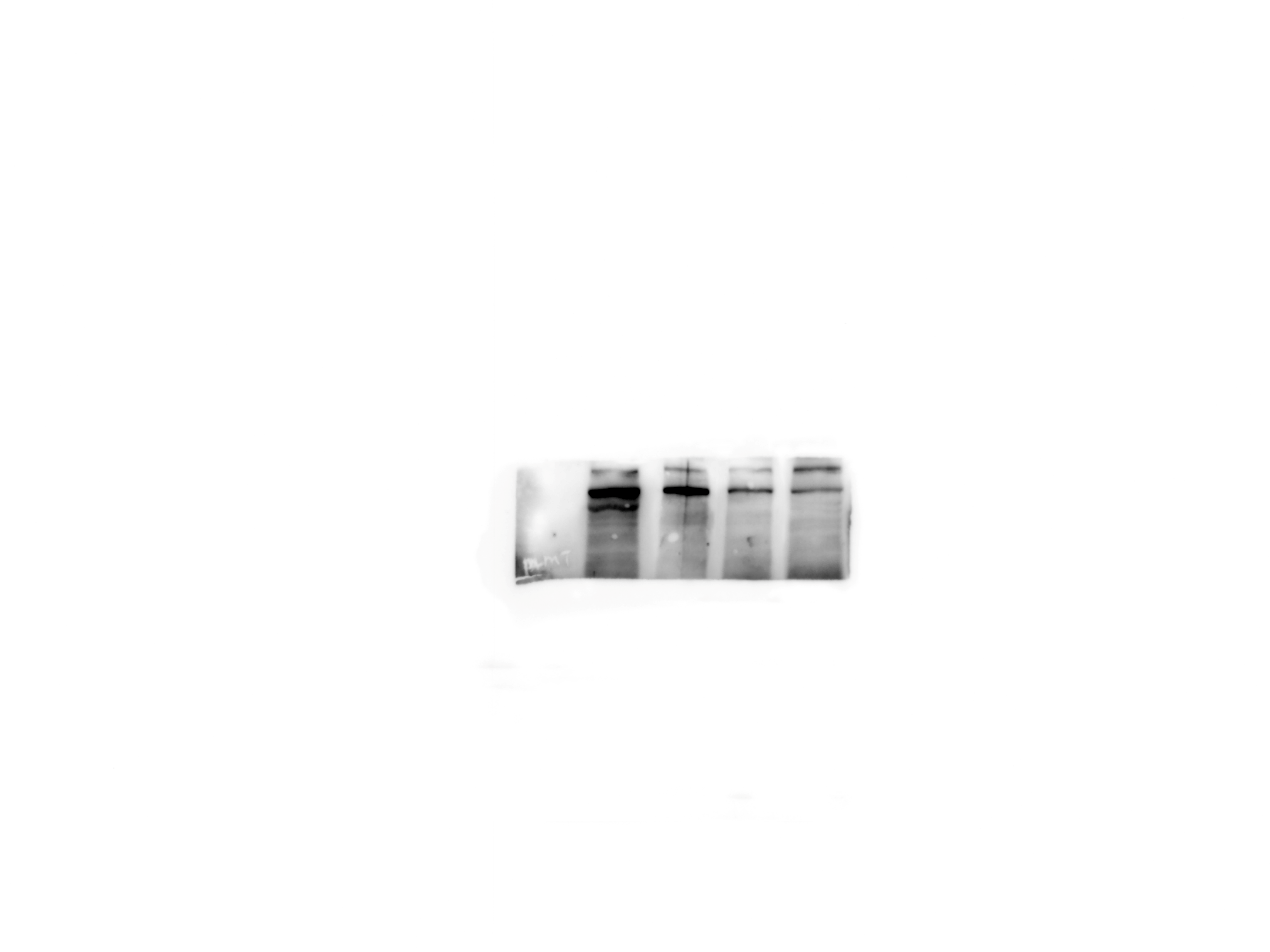


1. Cleaved-Caspase-3


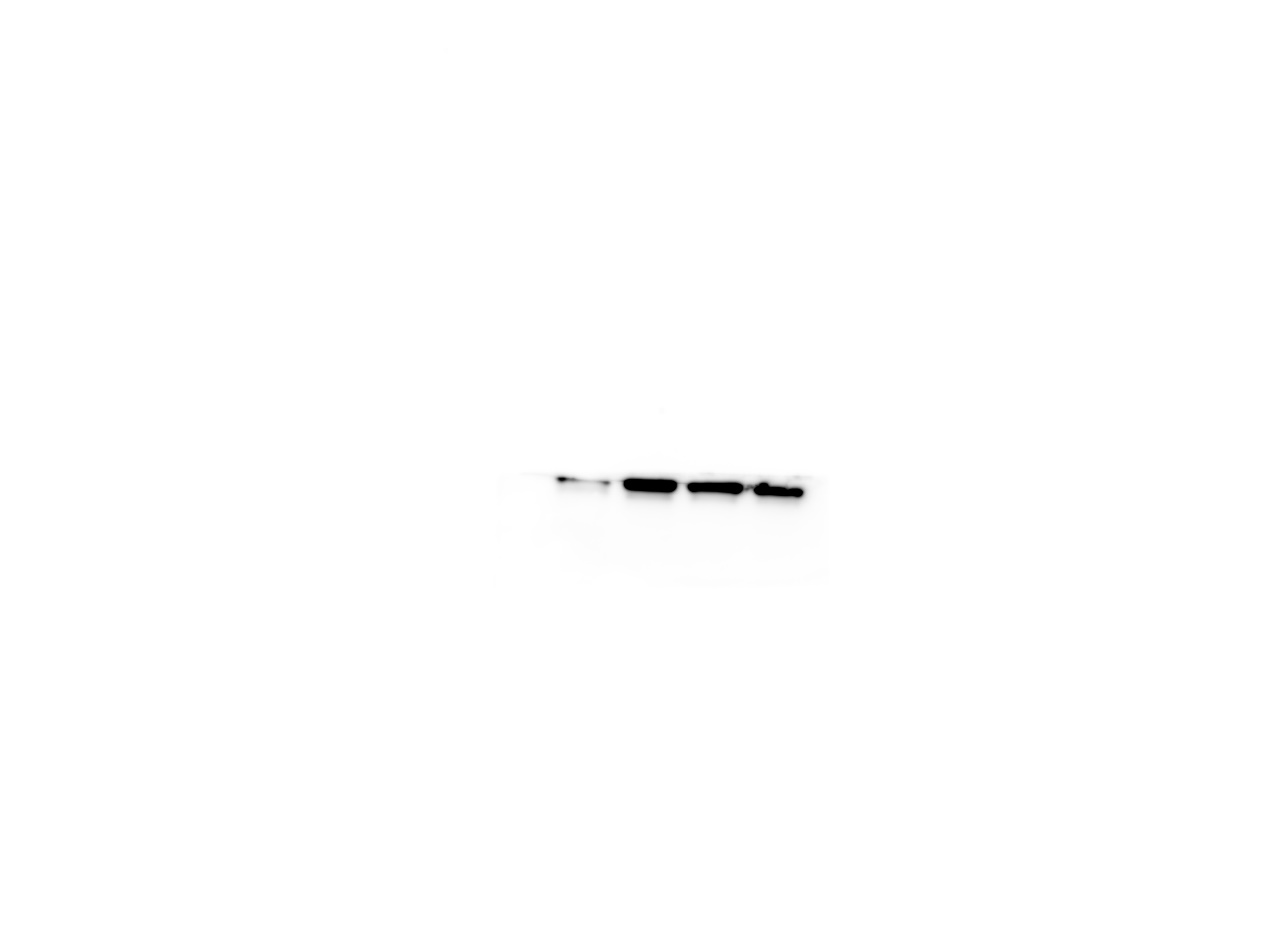


1. Bcl-2


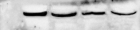


1. Bax


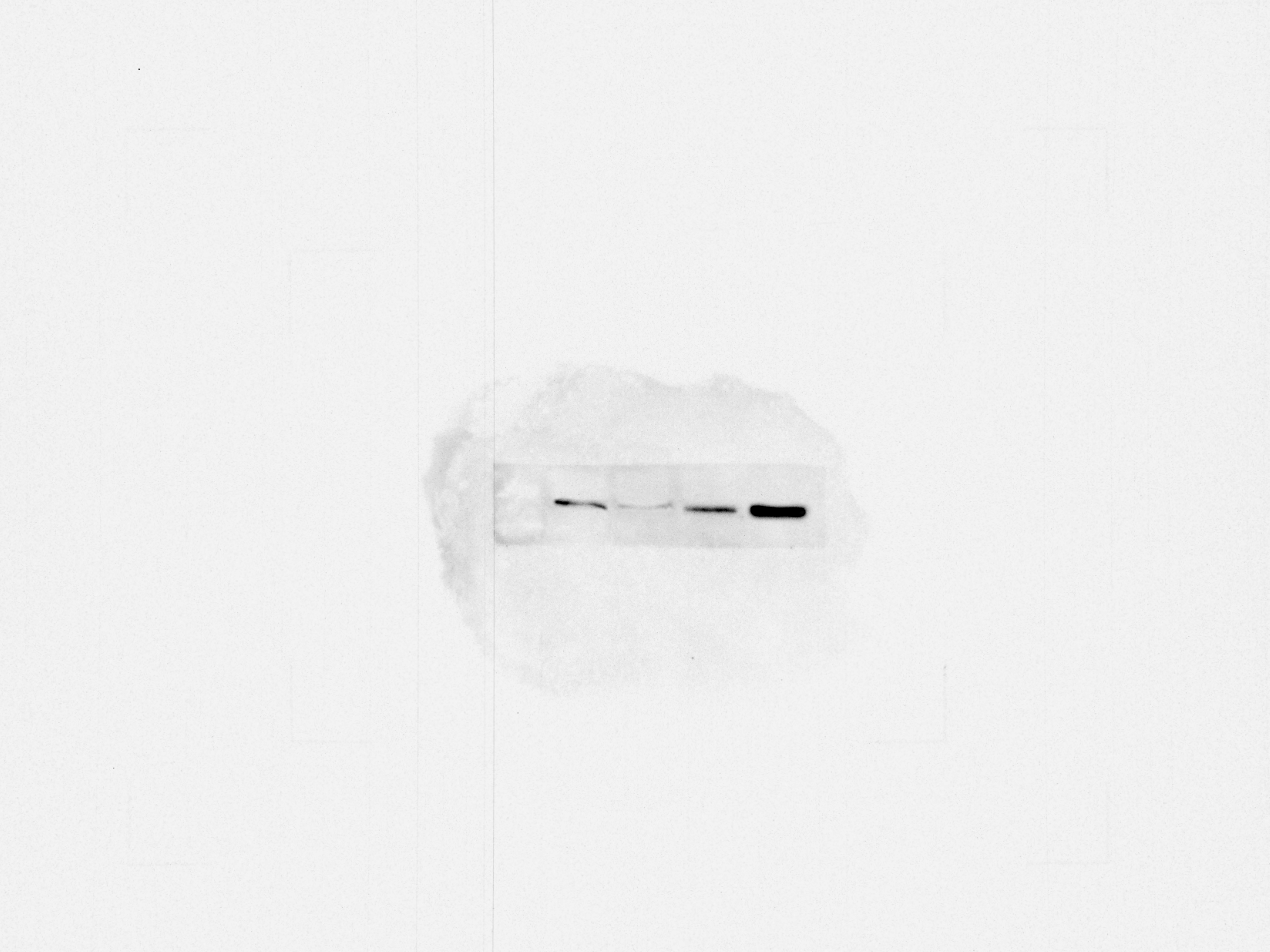


1. β-Tubulin
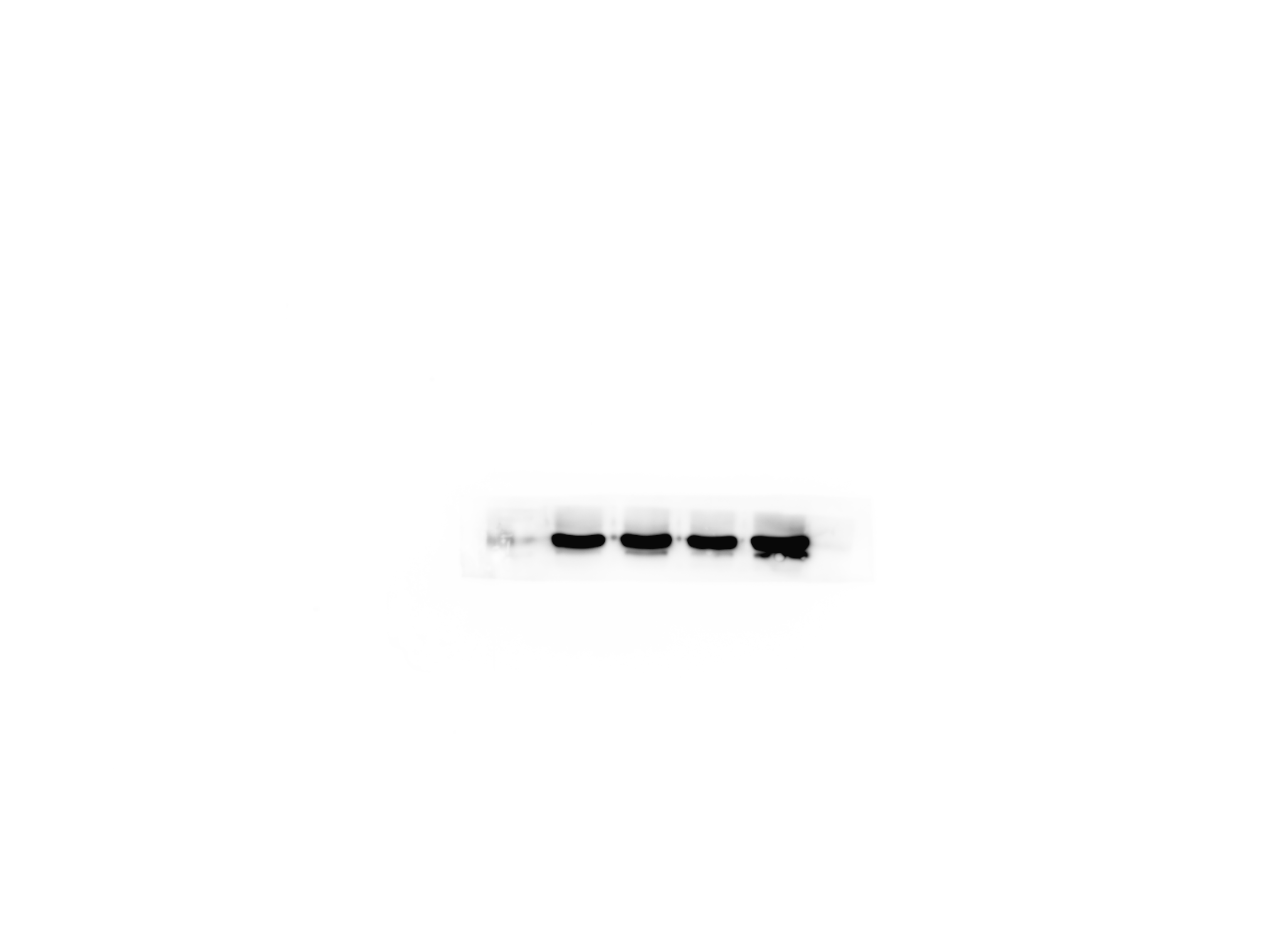

Supplement: Supplementary file 1 [file 783f2d446ea2790c107e8c8b.docx]
